# Supplementary material for: Isolation and Identification of Constituents Exhibiting Antioxidant, Antibacterial, and Antihyperuricemia Activities in Piper methysticum Root
Source: MDPI journal article supplement (doi:10.3390/foods11233889), 2022-12-01
Supplement: s1 [file s1]

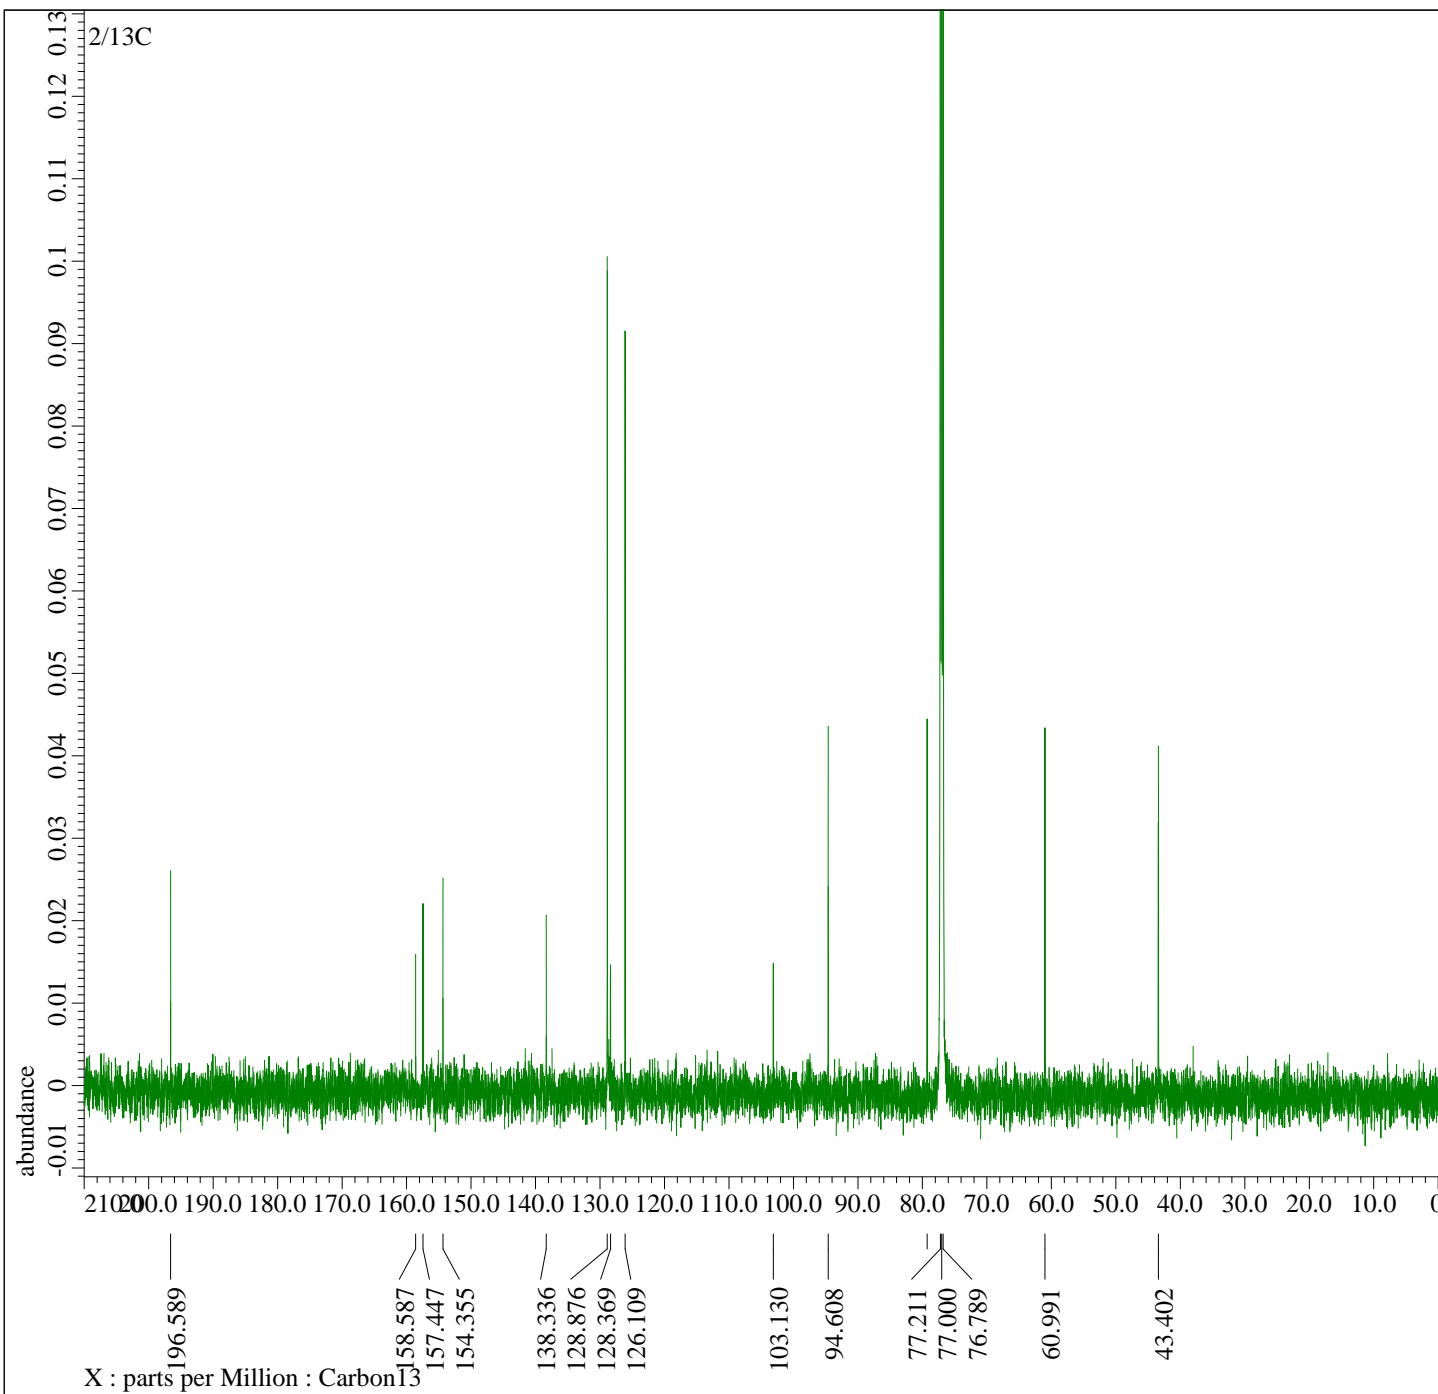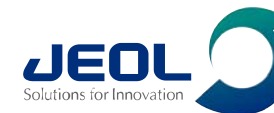

Filename = Van\_2\_13C-1-3.jdf  
Author = delta  
Experiment = carbon.jxp  
Sample\_Id = Van\_170925\_2  
Solvent = CHLOROFORM-D  
Creation\_Time = 25-SEP-2017 14:07:15  
Revision\_Time = 26-SEP-2017 15:49:34  
Current\_Time = 26-SEP-2017 15:50:11

Comment = 2/13C  
Data\_Format = 1D COMPLEX  
Dim\_Size = 26214  
Dim\_Title = Carbon13  
Dim\_Units = [ppm]  
Dimensions = X  
Spectrometer = DELTA2\_NMR

Field\_Strength = 14.09636928[T] (600[MHz])  
X\_Acq\_Duration = 0.69206016[s]  
X\_Domain = 13C  
X\_Freq = 150.91343039[MHz]  
X\_Offset = 100[ppm]  
X\_Points = 32768  
X\_Prescans = 4  
X\_Resolution = 1.44496109[Hz]  
X\_Sweep = 47.34848485[kHz]  
X\_Sweep\_Clipped = 37.87878788[kHz]  
Irr\_Domain = Proton  
Irr\_Freq = 600.1723046[MHz]  
Irr\_Offset = 5[ppm]  
Clipped = TRUE  
Scans = 4000  
Total\_Scans = 4000

Relaxation\_Delay = 2[s]  
Recvr\_Gain = 60  
Temp\_Get = 24.6[dC]  
X\_90\_Width = 10.2[us]  
X\_Acq\_Time = 0.69206016[s]  
X\_Angle = 30[deg]  
X\_Atn = 11.1[dB]  
X\_Pulse = 3.4[us]  
Irr\_Atn\_Dec = 24.81[dB]  
Irr\_Atn\_Noe = 24.81[dB]  
Irr\_Noise = WALTZ  
Irr\_Pwidth = 76[us]  
Decoupling = TRUE  
Initial\_Wait = 1[s]  
Noe = TRUE  
Noe\_Time = 2[s]  
Repetition\_Time = 2.69206016[s]
