# Supplementary material for: Isolation and Identification of Constituents Exhibiting Antioxidant, Antibacterial, and Antihyperuricemia Activities in Piper methysticum Root
Source: MDPI journal article supplement (doi:10.3390/foods11233889), 2022-12-01
Supplement: s1 [file s1]

EIS-MS 171196MS\_Xuan.pdf - Adobe Acrobat Reader DC

ファイル 編集 表示(V) ウィンドウ(W) ヘルプ(H)

ホーム ツール EIS-MS 171196MS\_X... ×

17 / 21

101%

C:\Xcalibur\...170926A\170926\_03  
MeOH soln.

2017/09/26 14:03:33 (2) V4

170926\_03 #7 RT: 0.07 AV: 1 NL: 1.27E6  
T: FTMS + p ESI Full ms [100.00-2000.00]

129.02971 z=?  
149.02287 z=1  
287.09131 z=1  
337.23486 z=1  
400.37851 z=1  
504.20889 z=1  
607.15759 z=1  
638.60889 z=?  
757.43085 z=1  
789.48981 z=?  
976.52325 z=?  
1069.33276 z=1  
1286.98401 z=?  
1457.02515 z=?  
1569.24365 z=?  
1689.50159 z=?  
1988.09570 z=?

170926\_03 #7 RT: 0.07 AV: 1 NL: 1.27E6  
T: FTMS + p ESI Full ms [100.00-2000.00]

273.20587 C<sub>15</sub>H<sub>29</sub>O<sub>4</sub> = 273.20604 -0.60133 ppm  
287.09131 C<sub>16</sub>H<sub>15</sub>O<sub>5</sub> = 287.09140 -0.31856 ppm  
293.20859 C<sub>16</sub>H<sub>30</sub>O<sub>3</sub>Na = 293.20872 -0.43775 ppm  
301.10699 C<sub>17</sub>H<sub>17</sub>O<sub>5</sub> = 301.10705 -0.18426 ppm  
315.25290 C<sub>18</sub>H<sub>35</sub>O<sub>4</sub> = 315.25299 -0.27559 ppm  
323.08893 C<sub>17</sub>H<sub>16</sub>O<sub>5</sub>Na = 323.08899 -0.20600 ppm  
337.23486 C<sub>18</sub>H<sub>34</sub>O<sub>4</sub>Na = 337.23493 -0.19998 ppm

PDF を書き出し

Adobe Export PDF

オンラインで PDF ファイルを Word または Excel に変換します

PDF ファイルを選択

EIS-MS 171196MS\_Xuan.pdf

次に変換:

Microsoft Word (\*.docx)

文書の言語:  
日本語 変更

変換

PDF を作成

PDF を編集

注釈

ファイルを結合

入力と署名

署名用に送信

送信とトラック

Acrobat Pro DC で PDF を変換・編集  
今すぐ無料でお試し

16:45  
2018/09/09
