# Supplementary material for: Isolation and Identification of Constituents Exhibiting Antioxidant, Antibacterial, and Antihyperuricemia Activities in Piper methysticum Root
Source: MDPI journal article supplement (doi:10.3390/foods11233889), 2022-12-01
Supplement: s1 [file s1]

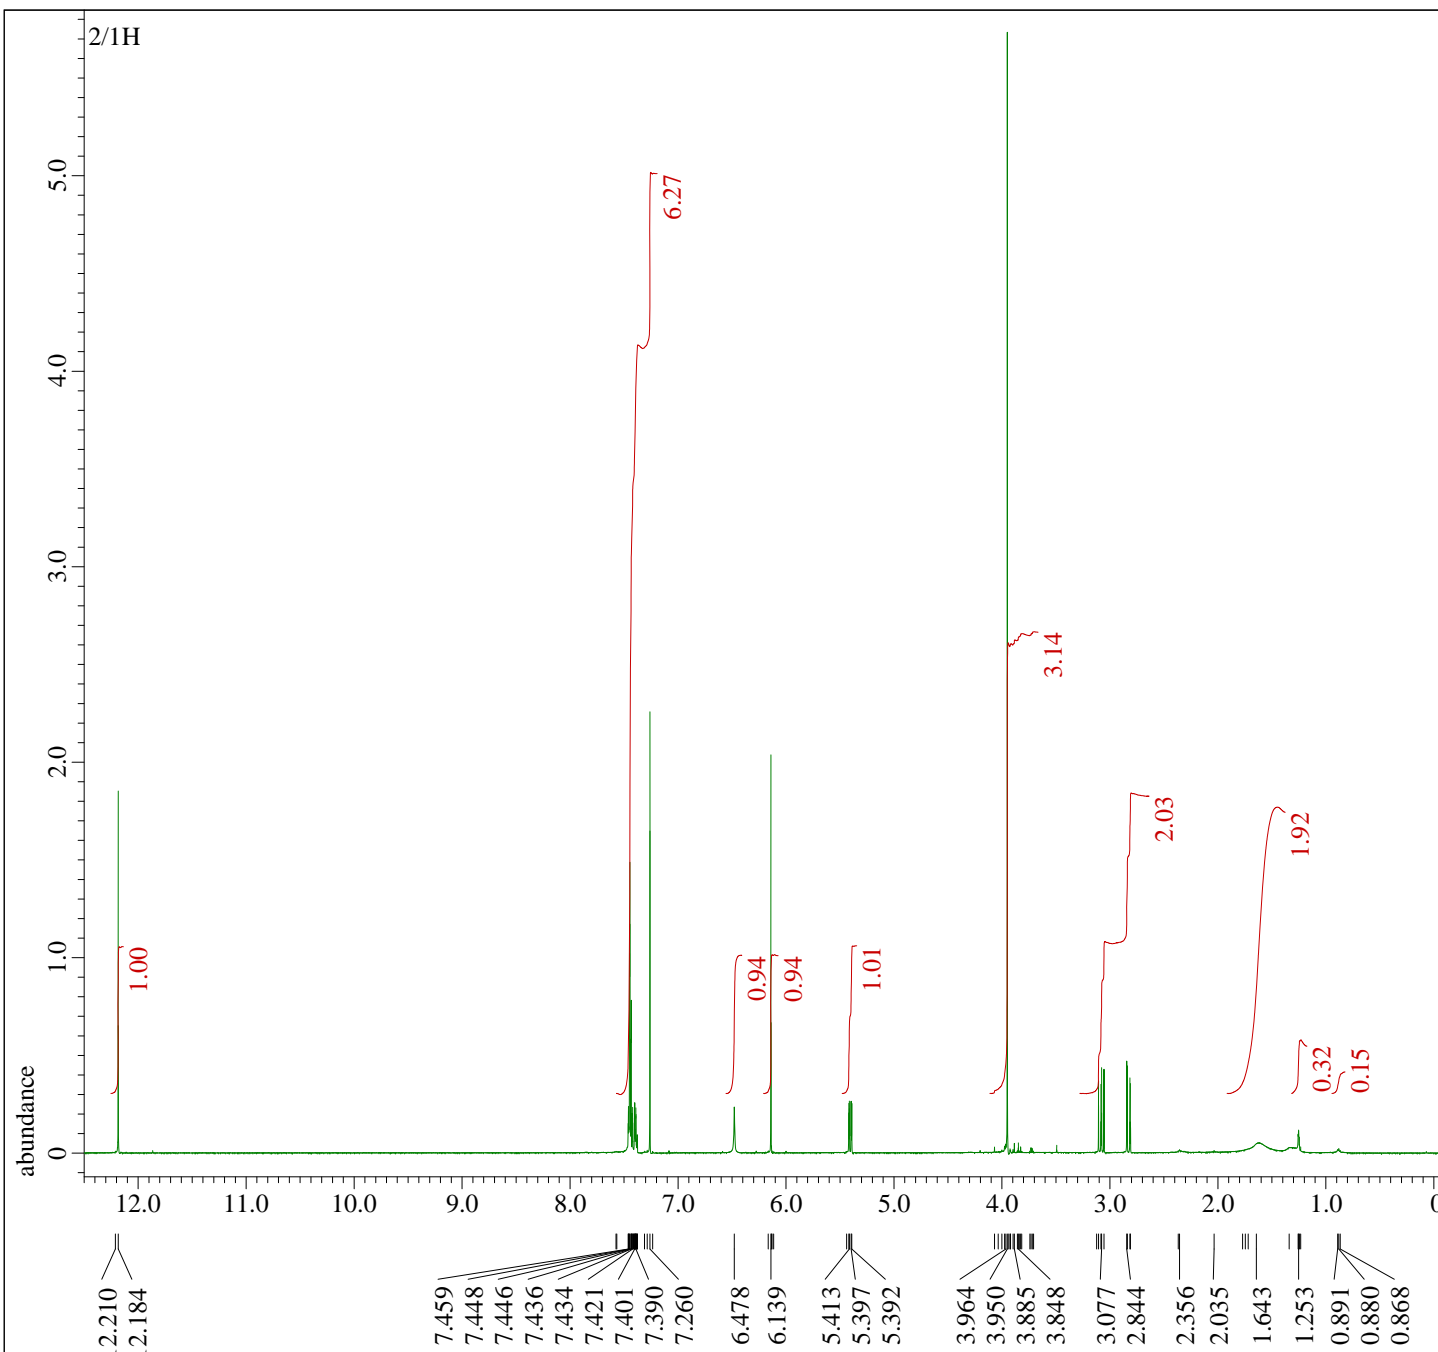

X : parts per Million : Proton

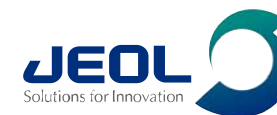

```

Filename       = Van_2_1H-1-4.jdf
Author        = delta
Experiment     = proton.jxp
Sample_Id      = Van_170925_2
Solvent        = CHLOROFORM-D
Creation_Time  = 25-SEP-2017 14:02:29
Revision_Time  = 26-SEP-2017 15:45:34
Current_Time   = 26-SEP-2017 15:46:41

Comment       = 2/1H
Data_Format    = 1D COMPLEX
Dim_Size       = 26214
Dim_Title      = Proton
Dim_Units      = [ppm]
Dimensions     = X
Spectrometer   = DELTA2_NMR

Field_Strength = 14.09636928[T] (600[MHz])
X_Acq_Duration = 2.9097984[s]
X_Domain       = 1H
X_Freq         = 600.1723046[MHz]
X_Offset       = 5[ppm]
X_Points       = 32768
X_Prescans     = 1
X_Resolution   = 0.34366642[Hz]
X_Sweep        = 11.26126126[kHz]
X_Sweep_Clippped = 9.00900901[kHz]
Irr_Domain     = Proton
Irr_Freq       = 600.1723046[MHz]
Irr_Offset     = 5[ppm]
Tri_Domain     = Proton
Tri_Freq       = 600.1723046[MHz]
Tri_Offset     = 5[ppm]
Clipped        = FALSE
Scans          = 32
Total_Scans    = 32

Relaxation_Delay = 5[s]
Recvr_Gain       = 52
Temp_Get         = 24[dC]
X_90_Width      = 13.5[us]
X_Acq_Time      = 2.9097984[s]
X_Angle         = 45[deg]
X_Atn           = 9.8[dB]
X_Pulse         = 6.75[us]
Irr_Mode        = Off
Tri_Mode        = Off
Dante_Presat    = FALSE
Initial_Wait    = 1[s]
Repetition_Time = 7.9097984[s]
  
```
