# Supplementary material for: Isolation and Identification of Constituents Exhibiting Antioxidant, Antibacterial, and Antihyperuricemia Activities in Piper methysticum Root
Source: MDPI journal article supplement (doi:10.3390/foods11233889), 2022-12-01

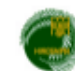

# ESI-MS spectrum (Positive ion, enlarged)

No. 4

180525\_02 #7 RT: 0.07 AV: 1 NL: 2.08E7  
T: FTMS + p ESI Full ms [100.00-2000.00]

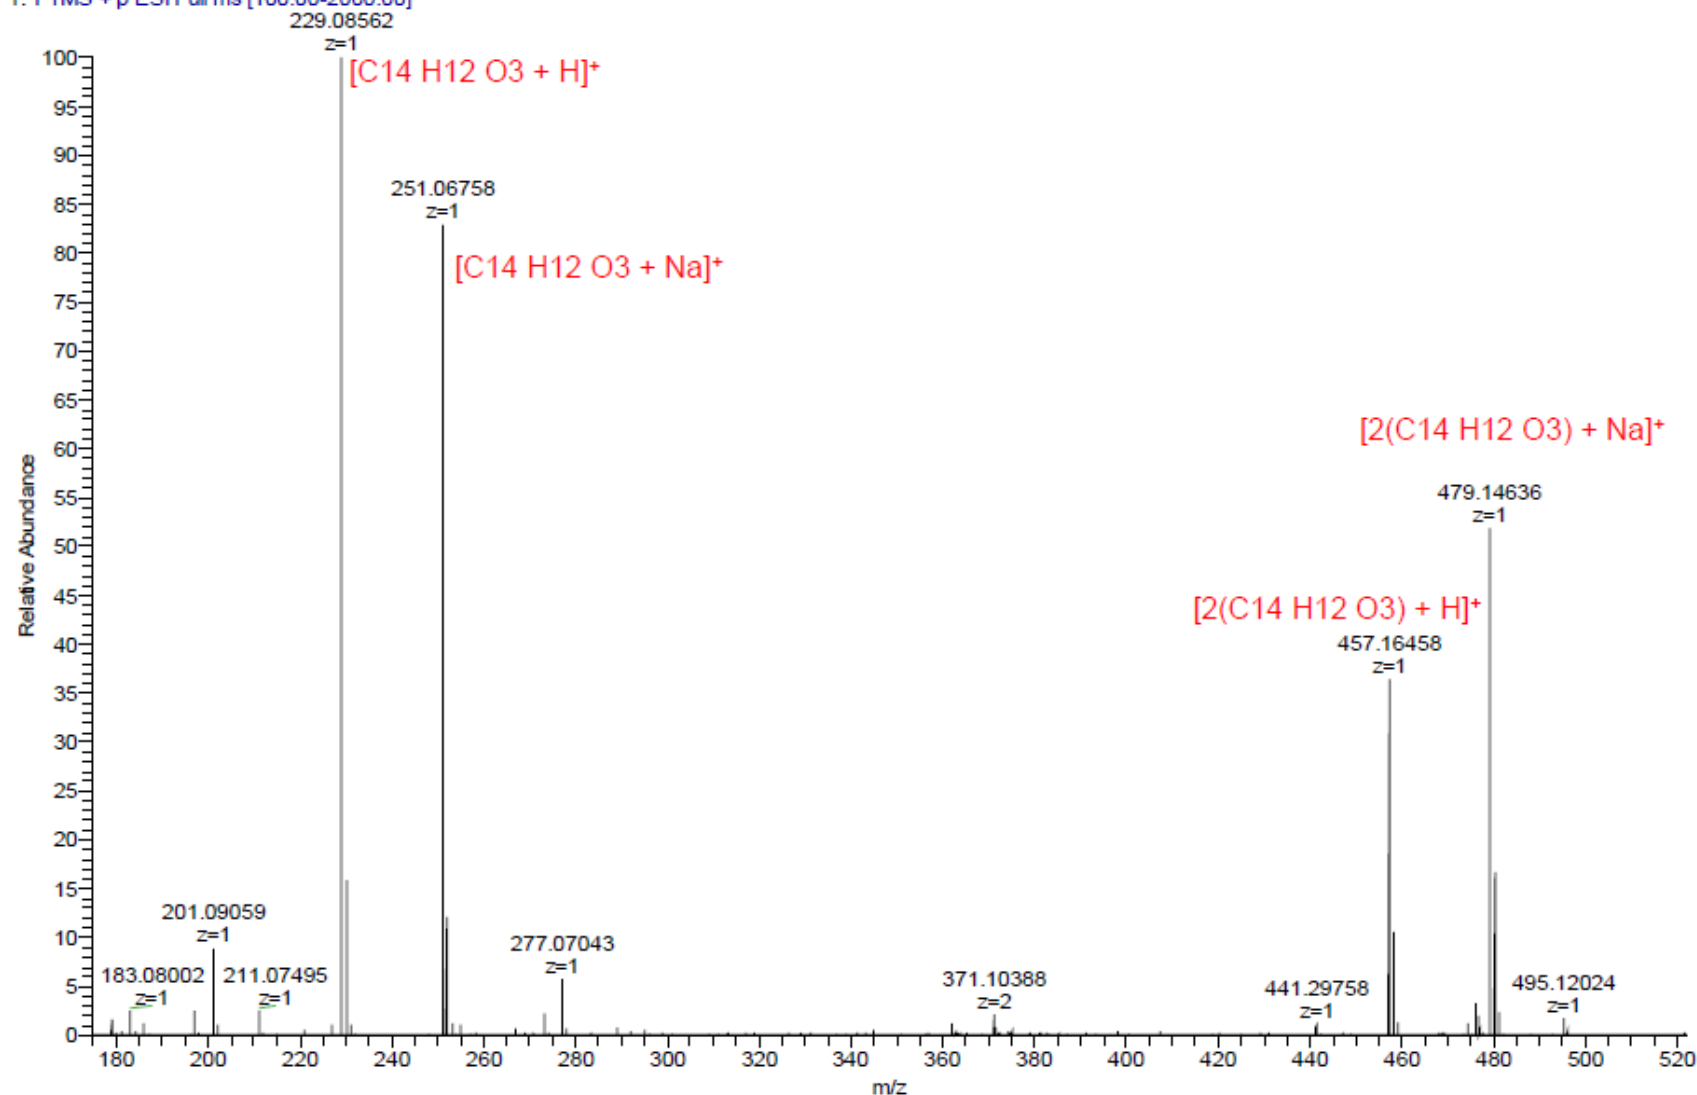

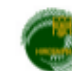

# ESI-MS spectrum (Negative ion mode)

No. 5

180525\_04 #4 RT: 0.06 AV: 1 NL: 4.80E6  
T: FTMS - p ESI Full ms [70.00-1400.00]

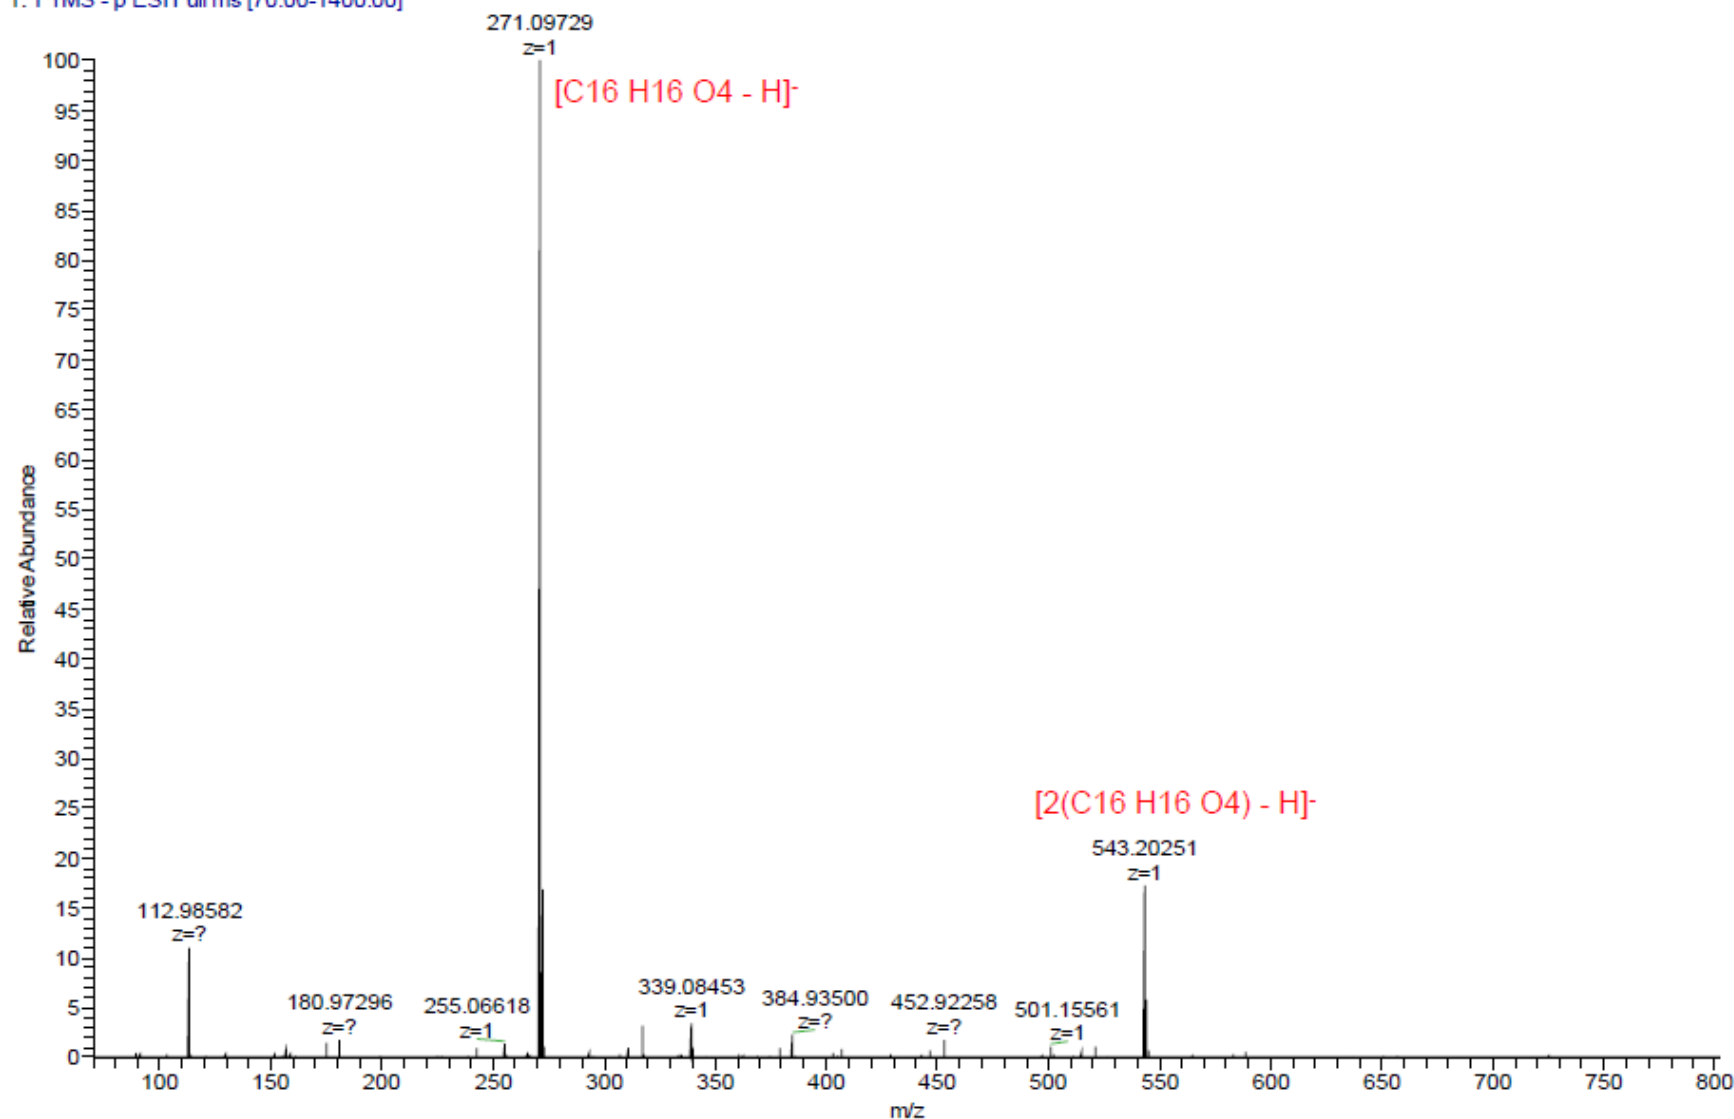

Supplement: s1 [file s1]
