# Supplementary material for: Isolation and Identification of Constituents Exhibiting Antioxidant, Antibacterial, and Antihyperuricemia Activities in Piper methysticum Root
Source: MDPI journal article supplement (doi:10.3390/foods11233889), 2022-12-01
Supplement: s1 [file s1]

$\times 10^6$  Intensity (62186790)

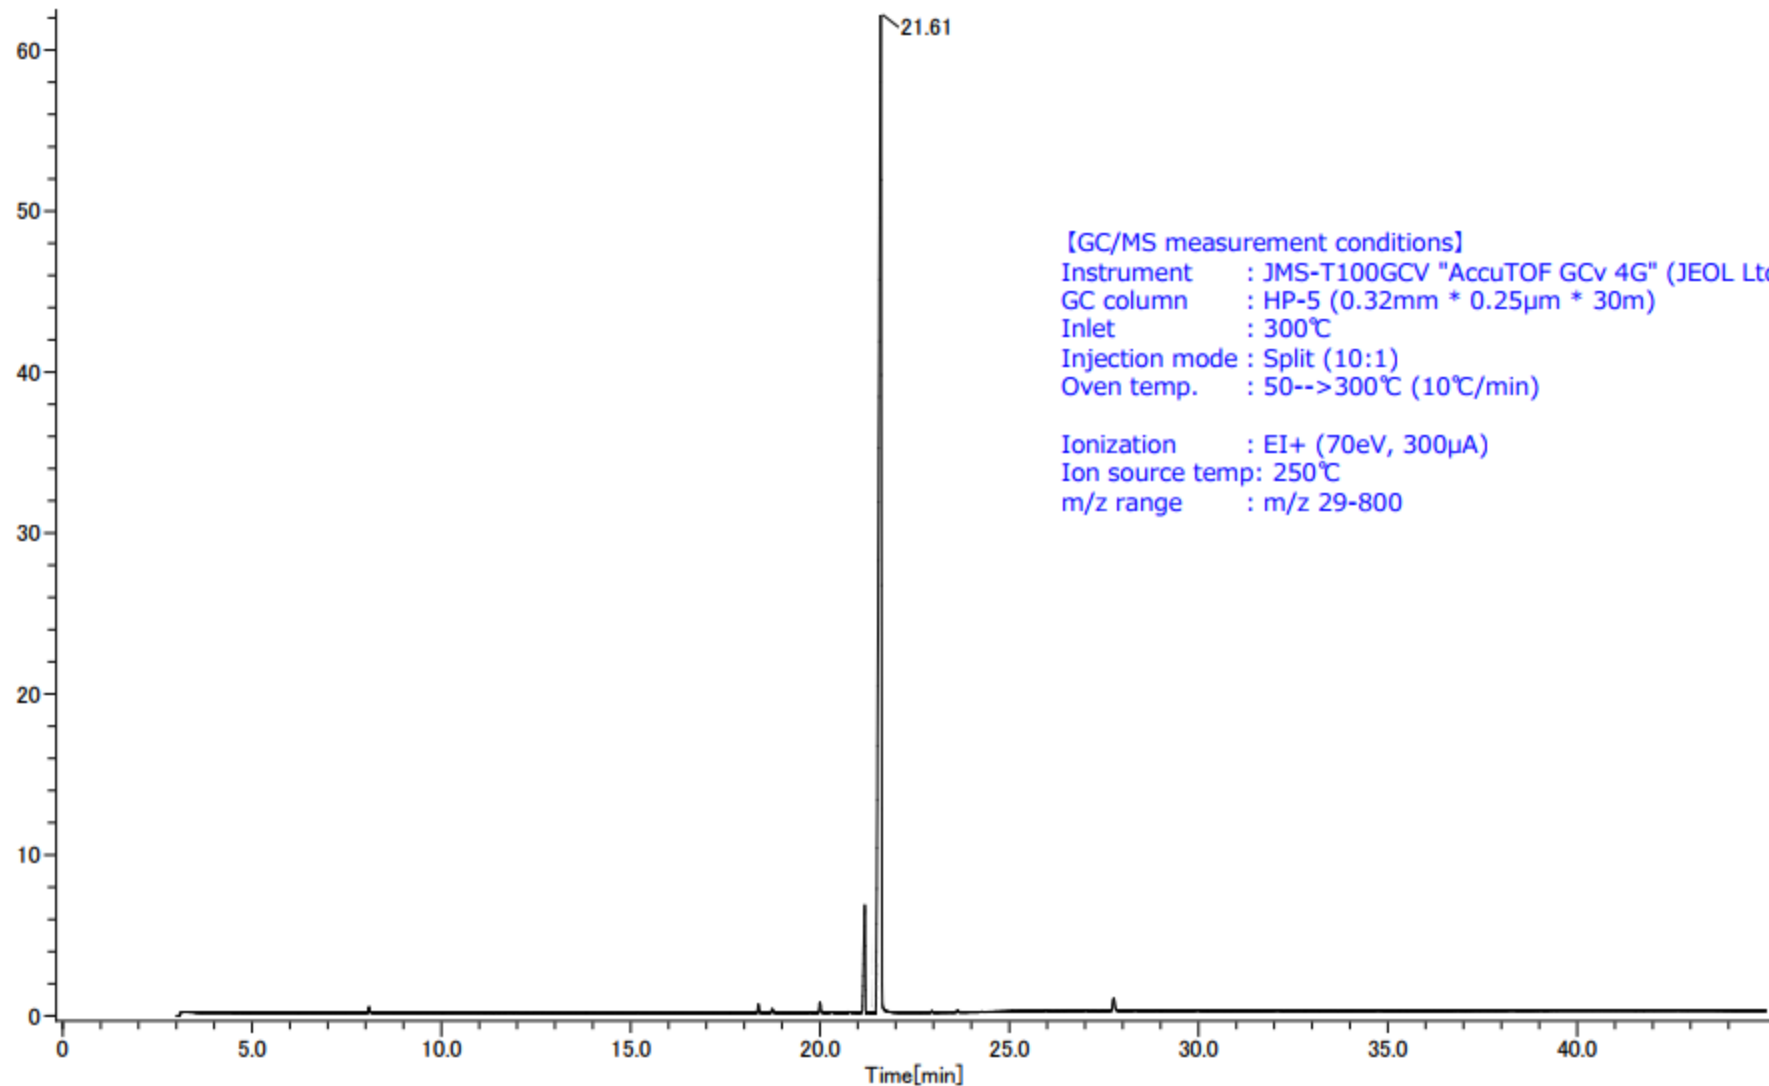

【GC/MS measurement conditions】

Instrument : JMS-T100GCV "AccuTOF GCv 4G" (JEOL Ltd.)

GC column : HP-5 (0.32mm \* 0.25 $\mu$ m \* 30m)

Inlet : 300 $^{\circ}$ C

Injection mode : Split (10:1)

Oven temp. : 50-->300 $^{\circ}$ C (10 $^{\circ}$ C/min)

Ionization : EI+ (70eV, 300 $\mu$ A)

Ion source temp: 250 $^{\circ}$ C

m/z range : m/z 29-800
