# Supplementary material for: Isolation and Identification of Constituents Exhibiting Antioxidant, Antibacterial, and Antihyperuricemia Activities in Piper methysticum Root
Source: MDPI journal article supplement (doi:10.3390/foods11233889), 2022-12-01
Supplement: s1 [file s1]

**Supplementary Table S1.** X-ray and NMR results of identified compounds from kava root

*5-hydroxy-4',7-dimethoxyflavanone (C1)*. Compound **C1** was isolated as a white powder from the combined fractions 14–17, which were eluted with Hexane:EtOAc 9:1. This compound was purified after eluting by hexane and filtering through a filter paper to remove contaminants. The identification as 5-hydroxy-4',7-dimethoxyflavanone (Figure 2) was obtained by analysis of its <sup>1</sup>H- and <sup>13</sup>C-NMR spectra and literature data [26]. <sup>1</sup>H-NMR δ (ppm): 12.8 (1H, s); 7.78 (2H, dd, 8 Hz, 4 Hz, H2' and H6'); 6.97 (2H, dd, 8 Hz, 4 Hz, H3' and H5'); 6.52 (1H, s, H3); 6.43 (1H, d, 4 Hz, H8); 6.32 (1H, d, 4 Hz, H6); 3.86 (3H, s); 3.85 (3H, s). <sup>13</sup>C-NMR δ (ppm): 163.9 (C2), 104.2 (C3), 182.4 (C4), 162.0 (C5), 98.0 (C6), 165.3 (C7), 92.5 (C8), 157.6 (C9), 105.4 (C10), 123.4 (C1'), 127.9 (C2'), 114.4 (C3'), 162.5 (C4'), 114.4 (C5'), 127.9 (C6'), 55.8 (C6'-OCH3), 55.5 (C7'-OCH3)

*Matteucinol (C2)*. Compound **C2** was precipitated as a yellow powder from fractions 20–26 which were eluted with Hexane:EtOAc 9:1. The identification as 5-hydroxy-4',7-dimethoxyflavanone (Figure 2) was obtained by analysis of its <sup>1</sup>H- and <sup>13</sup>C-NMR spectra and literature data [26]. <sup>1</sup>H-NMR δ (ppm): 2.03 (3H, s, 6-CH3), 2.05 (3H, s, 8-CH3), 2.78 (1H, dd, J = 17 Hz, 3 Hz, H-3β), 3.03 (1H, dd, J = 17 Hz, 13 Hz, H-3α), 3.83 (3H, s, OCH3), 5.32 (1H, dd, J = 13 Hz, 3 Hz, H-2), 6.95 (2H, d, J = 9 Hz, H-3',5'), 7.39 (2H, d, J = 9 Hz, H-2',6'), 12.29 (1H, s, chelated 5-OH). <sup>13</sup>C-NMR δ (ppm): 6.9 (6-CH3), 7.6 (8-CH3), 43.1 (3α, 3β), 55.2 (OCH3), 78.2 (C-1), 102.3 (C-8), 102.7 (C-10), 103.5 (C-6), 114.0 (C-3',5'), 127.4 (C-2',6'), 131.0 (C-1'), 157.7 (C-9), 158.8 (C-5), 159.6 (C-4'), 162.1 (C-7), 196.5 (C-4)

*5,7-dihydroxy-4'-methoxyflavanone (C3)*. Compound **C3** was isolated as a off white powder from the combined fractions 32–40 with Hexane:EtOAc 9:1. Hexane was also used to purify this compound with the purity being evaluated as 97.17% by GC-MS (Supplementary Material, Figure S1). According to ESI-MS data (m/z: 287.09 [M + H]<sup>+</sup>, Supplementary Material, Figure S2), the molecular formula of compound **C3** was determined as C<sub>16</sub>H<sub>14</sub>O<sub>5</sub>. The <sup>1</sup>H- result was interpreted to match 5,7-dihydroxy-4'-methoxyflavanone (Figure 1) by compared with spectroscopic data in the literature [27]. <sup>1</sup>H-NMR (400 MHz, CDCl<sub>3</sub>) δ 5.2.77 (1H, dd, J = 17.1, 3.0 Hz, H-3a), 3.09 (1H, dd, J = 17.1, 13.0 Hz, H-3b), 3.81 (3H, s, 4'-OMe), 5.33 (1H, dd, J = 13.0, 3.0 Hz, H-2), 5.84 (1H, br s, 7-OH), 5.95 (1H, d, J = 2.2 Hz, H-6), 5.97 (1H, d, J = 2.2 Hz, H-8), 6.93 (2x1H, d, J = 8.7 Hz, H-3', H-5'), 7.35 (2x1H, d, J = 8.7 Hz, H-2', H-6')

*5,7- dimethoxyflavanone (C4)*. Compound **C4** was isolated as a off white powder from the combined fractions 4–6 with Hexane:EtOAc 8:2. Hexane was also used to purify this compound with the purity being evaluated as 90% by GC-MS. The molecular formula of compound **C4** was determined as C<sub>17</sub>H<sub>16</sub>O<sub>4</sub>. The identification as 5-hydroxy-4',7-dimethoxyflavanone (Figure 2) was obtained by literature data [28]. ; <sup>1</sup>H NMR (CDCl<sub>3</sub>) δ 7.37-7.45 (5H, m, H-2', H3', H-4', H-5' and H-6'), 6.15 (1H, d, J = 2.2 Hz, H-8), 6.08 (1H, d, J = 2.2 Hz, H-6), 5.40 (1H, dd, J = 13.1, 2.9 Hz, H-2), 3.88 (3H, s, OMe-5), 3.81 (3H, s, OMe-7), 3.00 (1H, dd, J = 16.5, 13.1 Hz, H-3a), 2.79 (1H, dd, J = 16.5, 2.9 Hz, H-3b); <sup>13</sup>C NMR (CDCl<sub>3</sub>) δ 189.2 (C-4), 166.0 (C-7), 165.0 (C-5), 162.3 (C-8a), 138.7 (C-1'), 128.8 (C-3' and C-5'), 128.6 (C-4'), 126.1 (C-2' and C6'), 106.0 (C-4a), 93.5 (C-8), 93.2 (C-6), 79.2 (C-2), 56.1 (OMe-5), 55.6 (OMe-7), 45.6 (C-3)

*5,6-dehydrokawain (C6)*. Compound **C6** was isolated as pale-yellow needles from fractions 11–15 which were eluted with Hexane:EtOAc 8:2. Hexane was also used to purify this compound with

the purity being evaluated as 94.66% by GC-MS. The molecular formula of compound **C6** was determined as  $C_{14}H_{12}O_3$ . The identification as 5,6-dehydrokawain (Figure 2) was obtained by literature data [29].  $^1H$  NMR (400 MHz):  $\delta$  3.83 (s, 3H), 5.50 (d,  $J$  = 2.0 Hz, 1H), 5.95 (d,  $J$  = 2.4 Hz, 1H), 6.59 (d,  $J$  = 16.0 Hz, 1H), 7.35–7.52 (m, 6H);  $^{13}C$  NMR (400 MHz):  $\delta$  55.9, 88.8, 101.3, 118.6, 127.4, 128.9, 129.4, 135.2, 135.8, 158.6, 164.0, 171.1

*Yangonin* (**C8**). Compound **C8** was isolated as light yellow needles from fractions 48–55 which were eluted with Hexane:EtOAc 8:2. Its molecular formula was established to be  $C_{15}H_{14}O_4$  on the basis of ESI-MS:  $m/z$  259.1  $[M - H]^+$  (Supplementary Material, Figure S8). The purity of yangonin reached 93.64% according to GC-MS result (Supplementary Material, Figure S7). The compound was identified as yangonin (Figure 2) in the literature [30].  $^1H$ -NMR  $\delta$  (ppm): 5.45 (d,  $J$  = 2.1 Hz, H-3); 5.87 (d,  $J$  = 2.1 Hz, H-5); 6.43 (d,  $J$  = 16.0 Hz, H-7); 7.43 (d,  $J$  = 16.0 Hz, H-8); 7.42 (d,  $J$  = 8.8 Hz, H-10 and H-14); 6.88 (d,  $J$  = 8.8 Hz, H-11 and H-13); 3.82 (s, 4-OMe); 3.79 (s, 12-OMe).  $^{13}C$ -NMR  $\delta$  (ppm): 164.1 (C-2), 88.3 (C-3), 171.2 (C-4), 100.4 (C-5), 159.0 (C-6), 116.3 (C-7), 135.4 (C-8), 127.9 (C-9), 128.9 (C-10), 114.3 (C-11), 160.7 (C-12), 114.3 (C-13), 128.9 (C-14), 55.8 (4-OMe), 55.3 (12-OMe)

*Pinostrobin* (**C10**). Compound **C10** was isolated as light yellow needles from fractions 8–15 which were eluted with Hexane:EtOAc 7:3. Its molecular formula was established to be  $C_{16}H_{14}O_4$  on the basis of ESI-MS:  $m/z$  269.1  $[M - H]^+$  (Supplementary Material, Figure S10). The purity of pinostrobin reached 90.06% according to GC-MS result (Supplementary Material, Figure S9). The compound was identified as pinostrobin (Figure 2) in the literature [31].  $^1H$  NMR (400 MHz;  $CDCl_3$ ):  $\delta$  2.81 (3- cis), 3.86 (C-7-OMe), 3.10 (3-trans), 5.43 (2H, t,  $J$ =6.7), 6.03 (H-8), 6.04 (H-6), 7.28–7.49 (H-2'-H6'), 12.07 (C-5- OH).  $^{13}C$  NMR (100 MHz;  $CDCl_3$ ):  $\delta$  43.36 (C-3), 55.60 (C-7-OMe), 79.25 (C-2), 95.49 (C-6, C-8), 103.20 (C-4a), 126.17 (C-2', C-6'), 128.92 (C-3', C-4', C-5'), 138.30 (C-1'), 163.16 (C-5), 164.36 (C-7), 164.63 (C-8a), 195.79 (C-4).
