# Supplementary figures and images for: Isolation and Identification of Constituents Exhibiting Antioxidant, Antibacterial, and Antihyperuricemia Activities in Piper methysticum Root
Source: MDPI journal article supplement (doi:10.3390/foods11233889), 2022-12-01

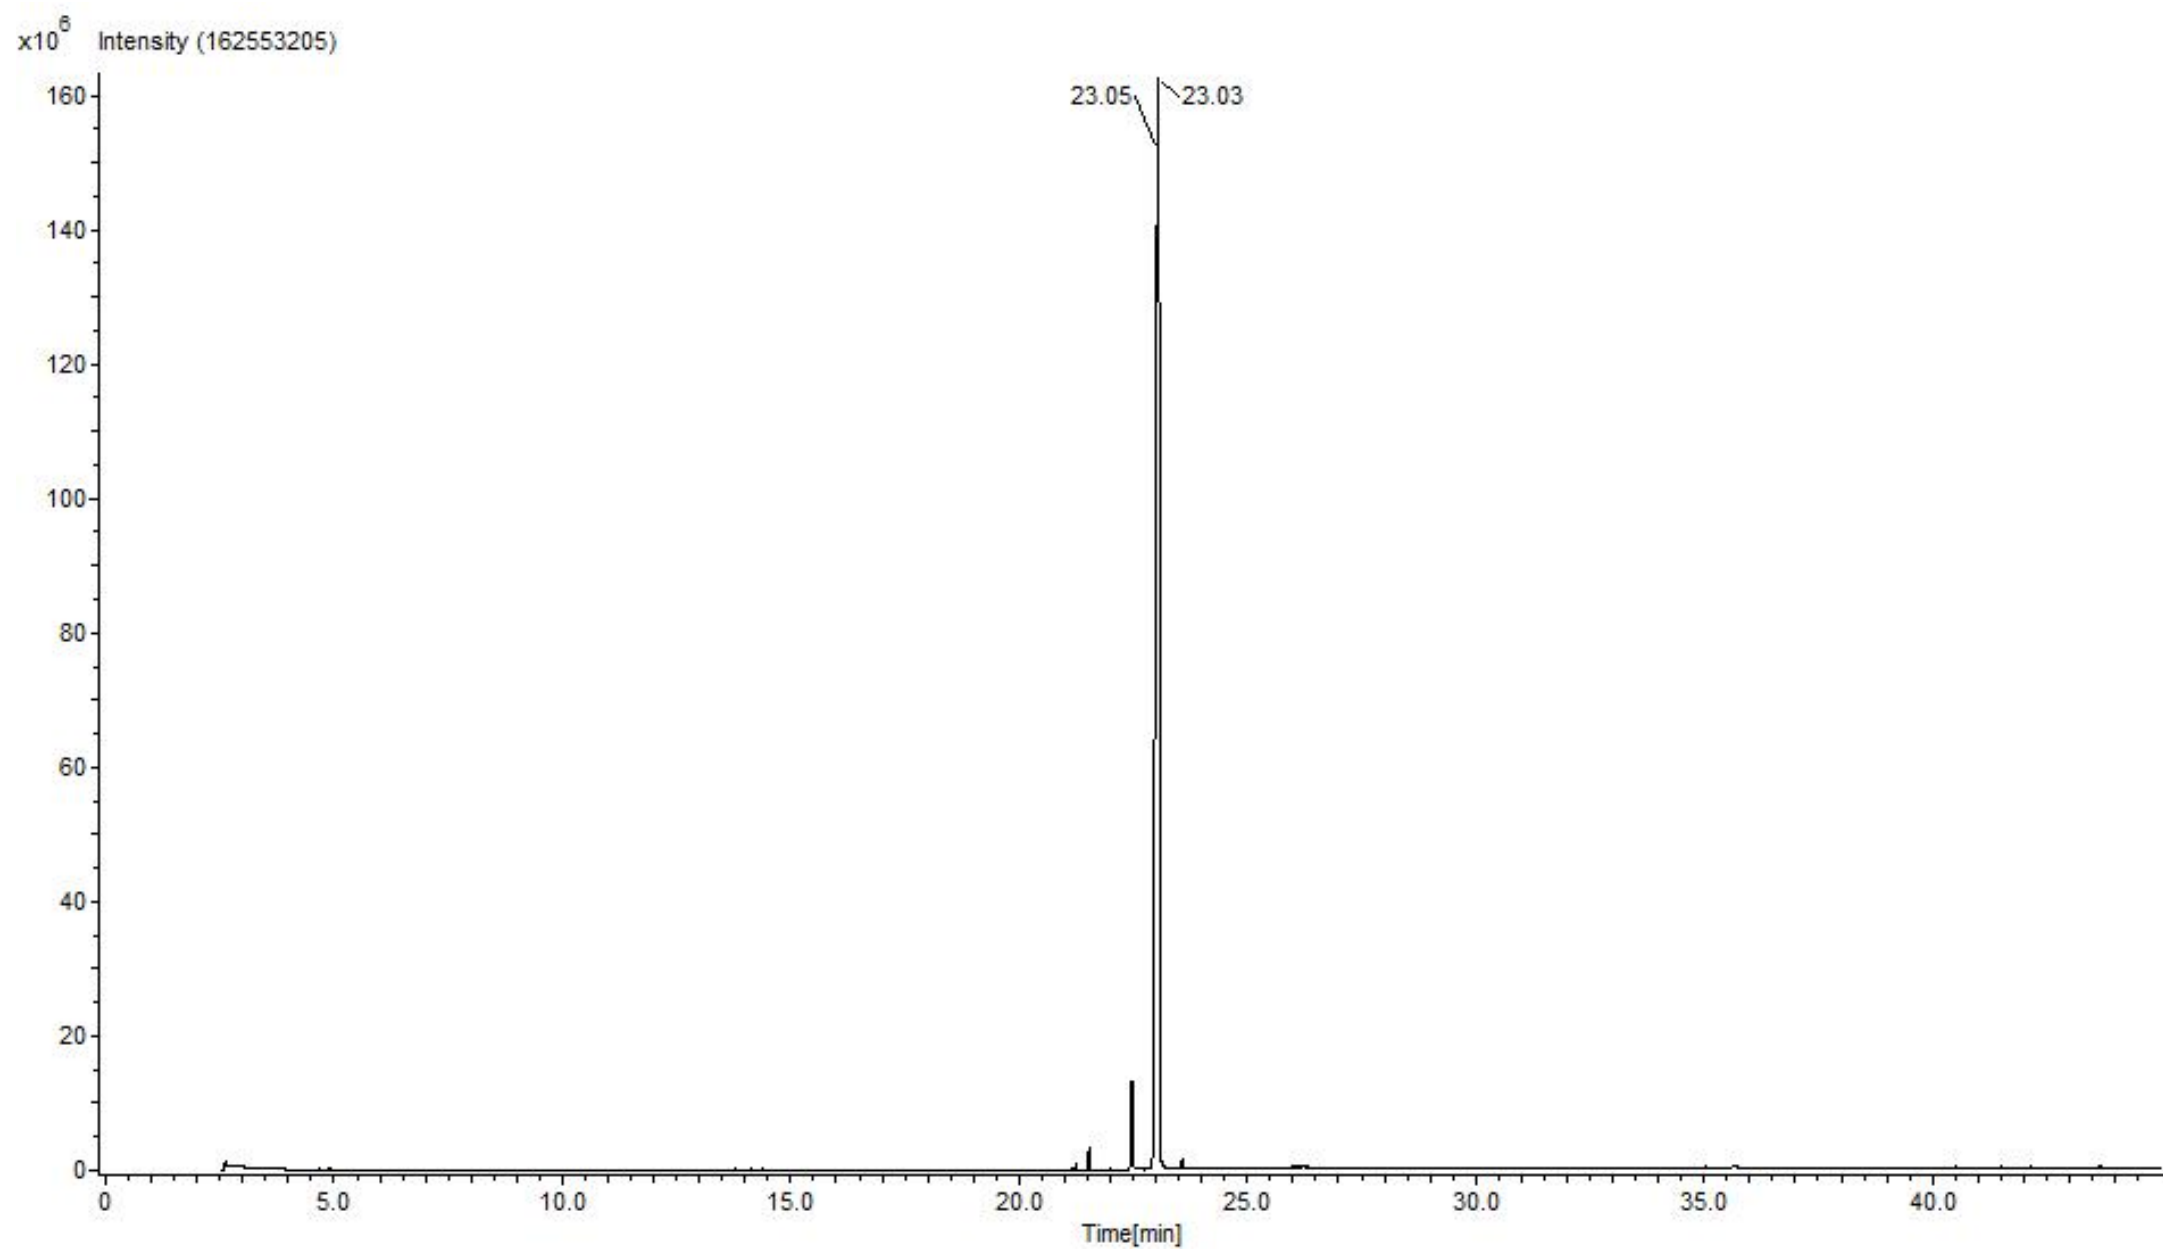

Supplement: s1 [file s1]

$\times 10^6$  Intensity (124550827)

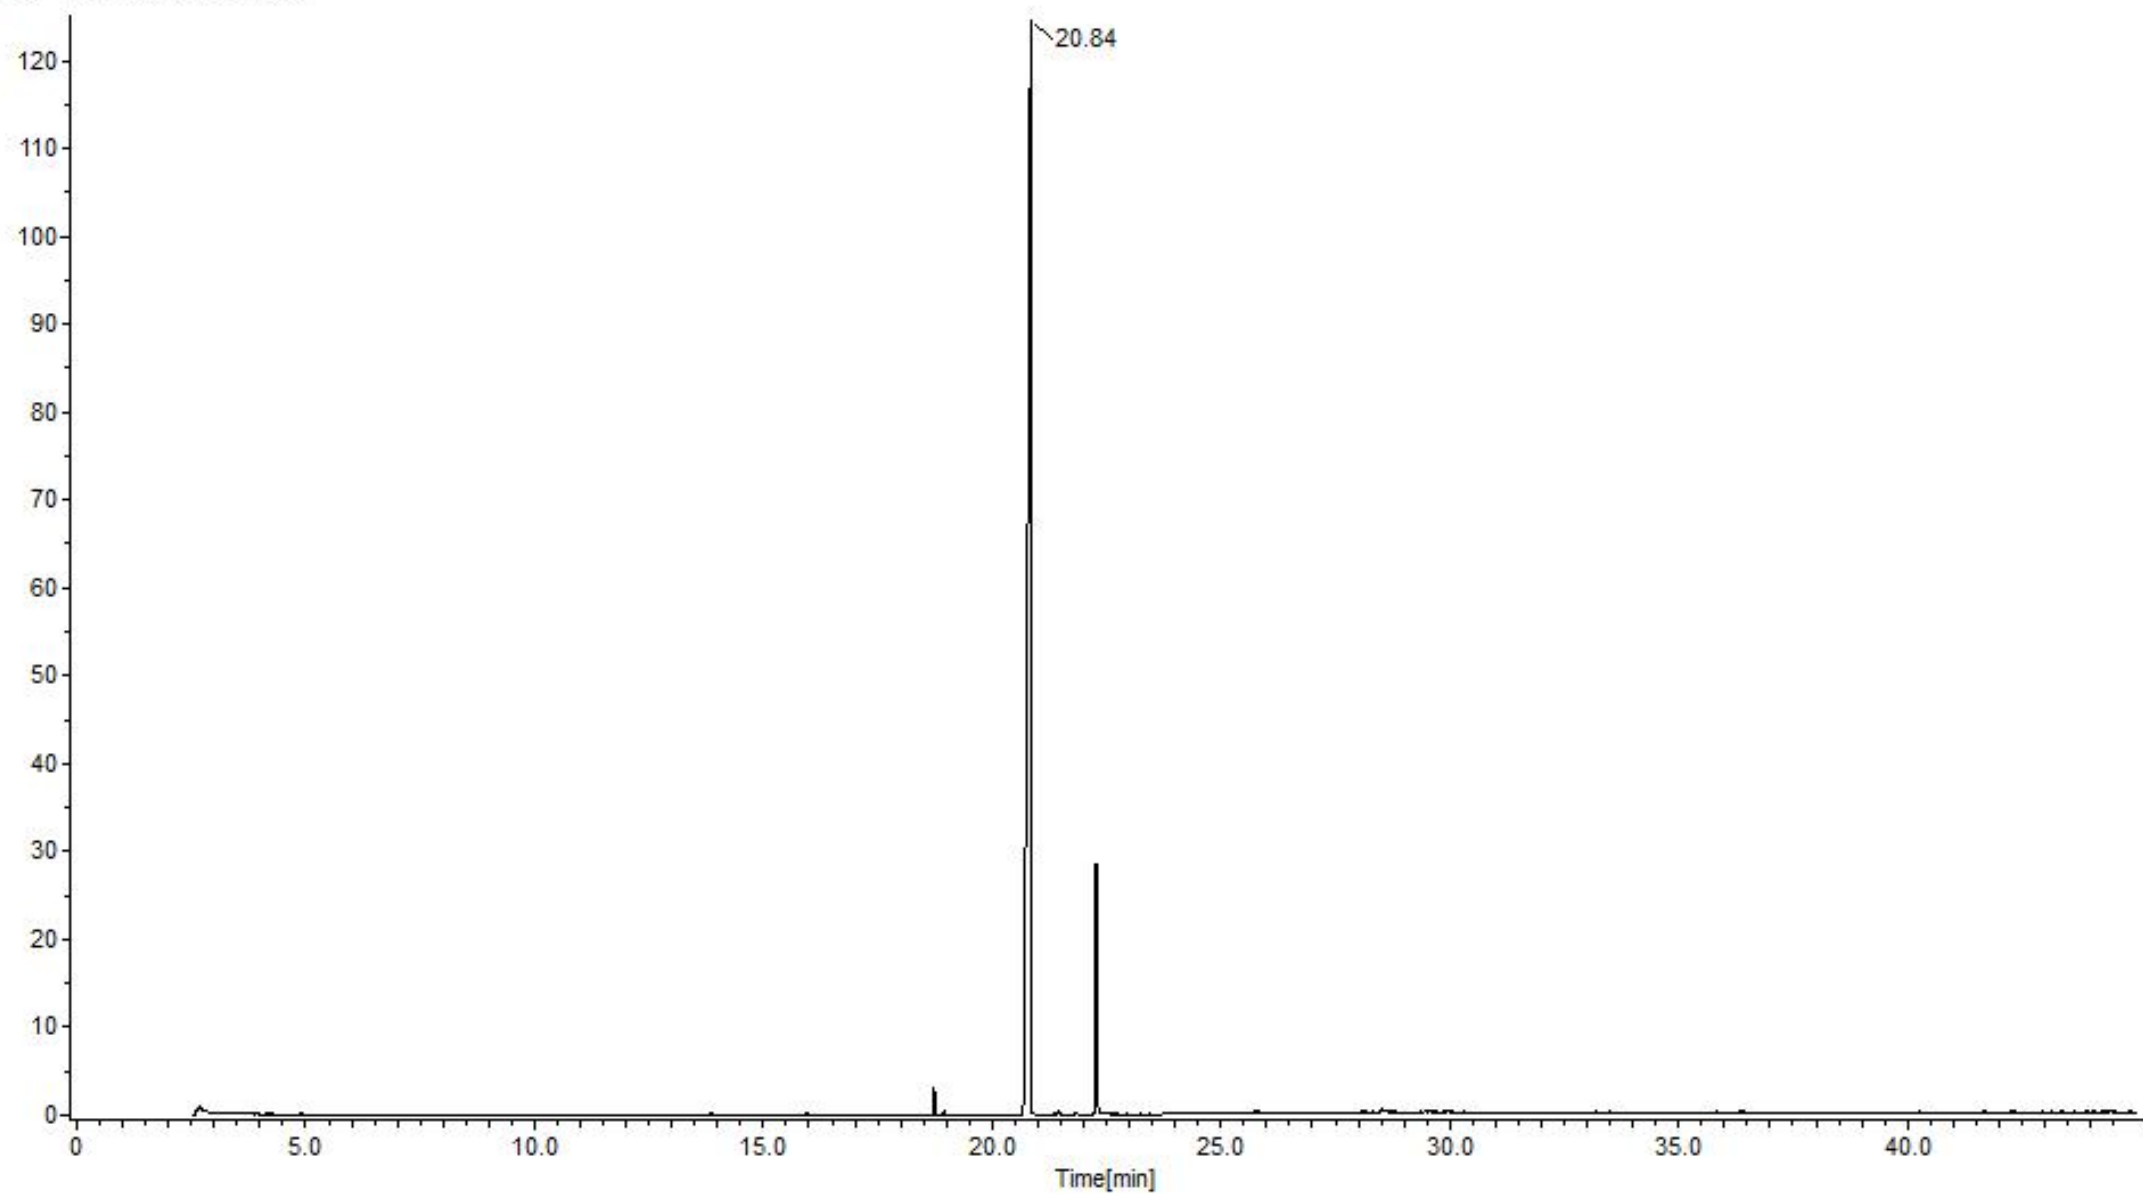

Supplement: s1 [file s1]

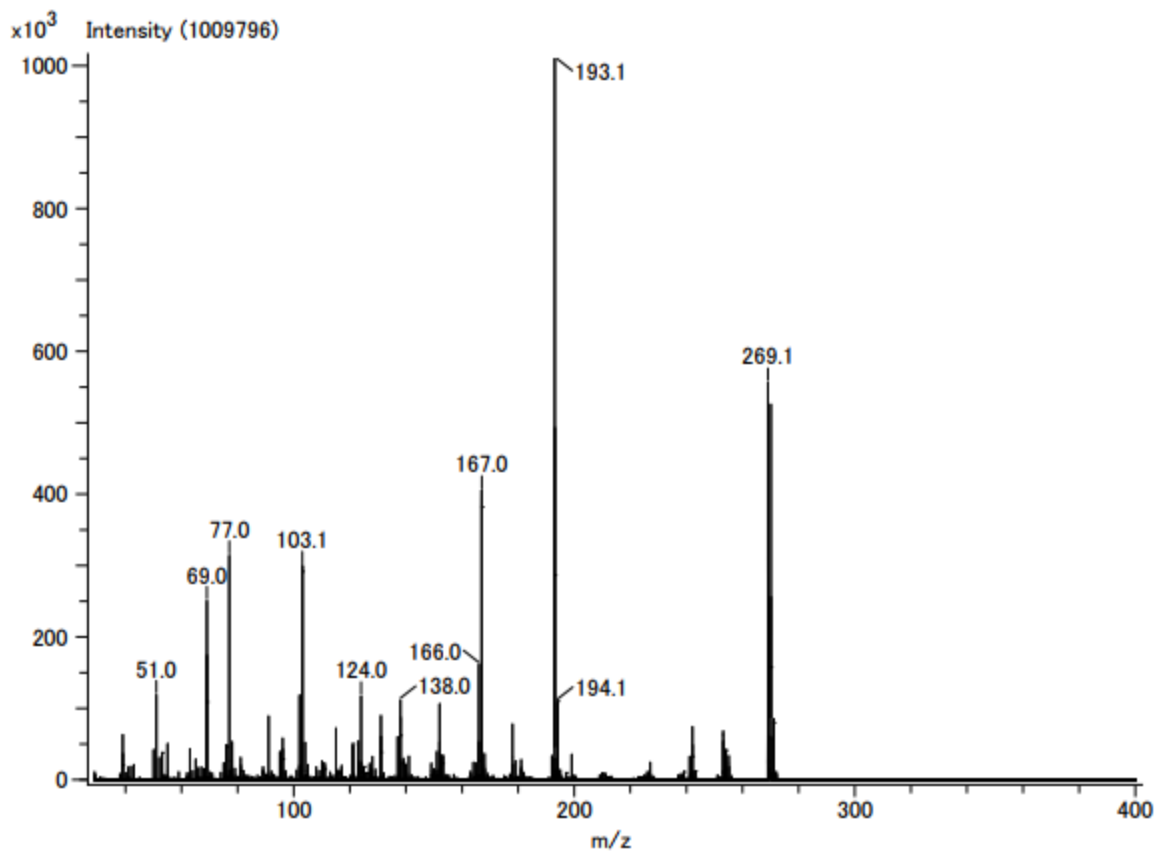

Supplement: s1 [file s1]

x10<sup>6</sup> Intensity (89761430)

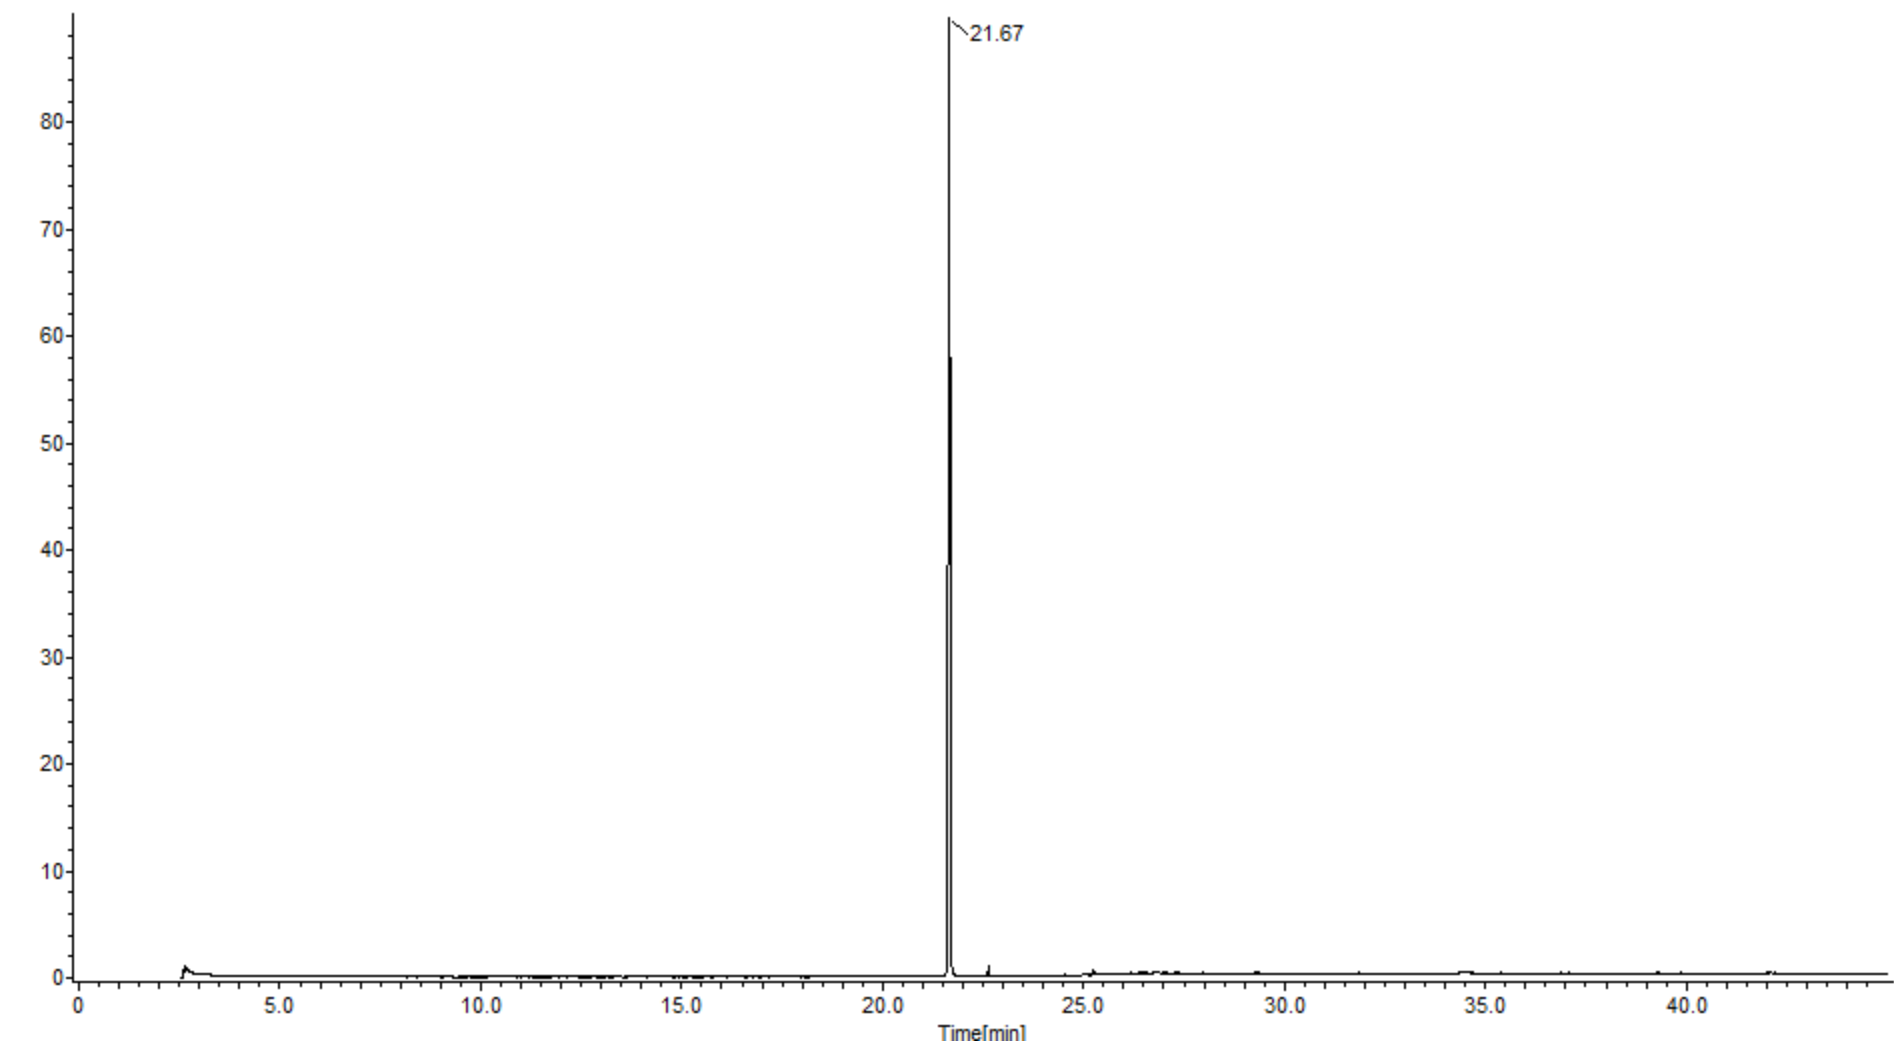

Supplement: s1 [file s1]
